# Supplementary material for: Single-cell RNA and protein profiling of immune cells from the mouse brain and its border tissues
Source: Springer Nature journal article supplement (doi:10.1038/s41596-022-00716-4), 2022-08-05
Supplement: MOESM1 [file 41596_2022_716_MOESM1_ESM20.pdf]

---

**Supplementary information**

---

**Single-cell RNA and protein profiling of  
immune cells from the mouse brain and its  
border tissues**

---

In the format provided by the  
authors and unedited

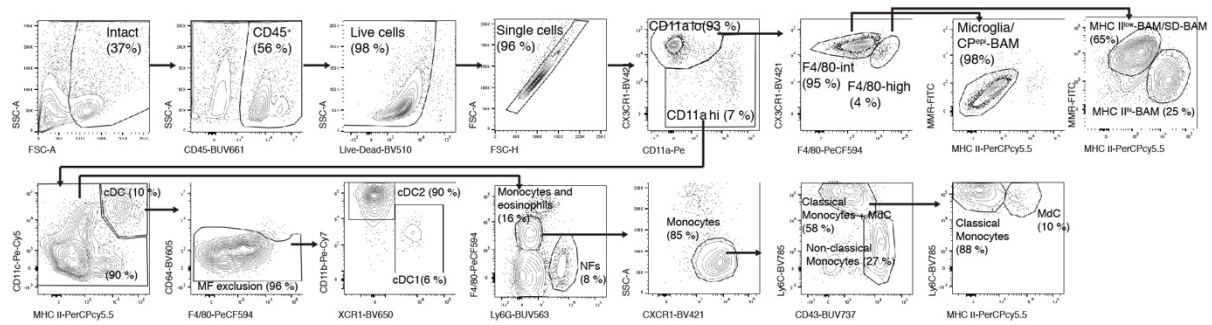

### Supplementary Figure 1. Gating strategy for brain myeloid populations, using antibody mix 2.

Single cell suspensions from whole brains of 9-week-old male C57BL/6 mice were stained with antibody mix 2 in BOX1. Brain immune cells are gated as CD45<sup>+</sup>, intact, live, single cells. Microglia/CP<sup>epi</sup>-BAM (in choroid plexus sample) are gated as CX3CR1<sup>hi</sup> CD11a<sup>lo</sup> F4/80<sup>int</sup> MMR<sup>lo</sup> MHCII<sup>lo</sup>, BAMs are gated as CX3CR1<sup>hi</sup> CD11a<sup>lo</sup> F4/80<sup>hi</sup> and subdivided into MMR<sup>hi</sup> MHCII<sup>lo</sup> BAMs (SD-BAM in the subdural meninges sample) and MMR<sup>lo</sup> MHCII<sup>hi</sup> BAMs. Conventional dendritic cells (cDCs) are gated as CD11a<sup>hi</sup> CD11c<sup>hi</sup> MHCII<sup>hi</sup> CD64<sup>lo</sup> F4/80<sup>lo</sup> and subdivided in CD11b<sup>hi</sup> cDC2 and XCR1<sup>hi</sup> cDC1. Monocytes are gated as CD11a<sup>hi</sup> CD11c<sup>lo</sup> MHCII<sup>lo</sup> F4/80<sup>int</sup> Ly6G<sup>lo</sup> SSC-A<sup>lo</sup> CX3CR1<sup>+</sup> and subdivided in Ly6C<sup>hi</sup> CD43<sup>lo</sup> classical monocytes and Ly6C<sup>lo-int</sup> CD43<sup>hi</sup> non-classical monocytes. Neutrophils are gated as CD11a<sup>hi</sup> CD11c<sup>lo</sup> MHCII<sup>lo</sup> F4/80<sup>lo</sup> Ly6G<sup>hi</sup>. Animal experiments were approved by the Ethische Commissie Dierproeven at the Vrije Universiteit Brussel.
